# Supplementary material
Source: publisher site journal article supplement (https://static.cambridge.org/content/id/urn:cambridge.org:id:article:S1041610219000322/resource/name/S1041610219000322supp001.docx)
Supplement: Supplementary file 1 [file S1041610219000322supp001.docx]

Appendix A: final measure and instructions

**Behaviour Thought Feeling Questionnaire - Dementia (BTFQ-D)***

**Say**: *‘I am now going to read a list of words and I’d like you to tell me if the word is something you do, something you think or something you feel.*’

**Say** ‘*So you can understand the task I will give you some examples for each example say ‘X - is that something you do, something you think or something you feel’ X = going shopping, Excited, I’ve got a lot to do.*

**if incorrect. Give feedback using the instructions below**:

*Say ‘ I can see how someone might think that that is a behaviour/ feeling/thought but we have it down as a behaviour because going shopping is something you do/a feeling because excited is something that you feel/a thought because I’ve got a lot to do is something that goes through your mind****’***

**DO NOT GIVE FURTHER FEEDBACK ON THE OTHER ITEMS**

***Say*** *OK, That’s great. Now lets try some more. Remember I want you to tell me if the word is something you do, something you think or something you feel.*

Start by saying ‘X -is that something you do, something you think or something you feel’ If repeating the instruction becomes unnecessary (person understands/is irritated) just say the item without the instruction from then on

| **Question** | **Response** | **Correct response** |
| --- | --- | --- |
| 1) Sad |  | **F** |
| 2) Angry |  | **F** |
| *3) Working* |  | ***B*** |
| 4) This is hard |  | **T** |
| *5) Answering the phone* |  | ***B*** |
| 6) Happy |  | **F** |
| *7) Making a cup of tea* |  | ***B*** |
| 8) I’m good at things |  | **T** |
| 9) Worried |  | **F** |
| 10) I don’t know what to do for the best |  | **T** |
| *11) Gardening* |  | ***B*** |
| 12) I hope this works out |  | **T** |
| *13) Having a bath* |  | ***B*** |
| 14) Frightened |  | **F** |
| 15) I’ve achieved something |  | **T** |
| 16) Frustrated |  | **F** |
| *17) Washing up* |  | ***B*** |
| 18) I’m a good person |  | **T** |
| *19) Playing darts* |  | ***B*** |
| 20) Upset |  | **F** |
| 21) I’m looking forward to my holiday |  | **T** |
| 22) Miserable |  | F |

Feeling /7 (above chance responding =5); Thought/7(above chance responding = 5).

NB Behaviour items (in italics) are not included in the scoring but should be administered in the measure to maintain face validity

*Measure should be referenced as “BTFQ-D (Oathamshaw & Haddock, 2006, adapted Stott et al., 2018)”
